# Supplementary material for: Significant suppression of exothermic heat flow in silicon anodes via in situ polymerization of phosphonium ionic liquids
Source: Royal Society of Chemistry journal article supplement (doi:10.1039/d4ta07578a), 2025-01-01
Supplement: d4ta07578a1.pdf [file d4ta07578a1.pdf]

## Electronic Supporting Information

### Significant Suppression of Exothermic Heat Flow in Silicon Anodes via In-Situ Polymerization of Phosphonium Ionic Liquids

Won-Jang Cho<sup>a</sup>, Seunghyeon Lee<sup>b</sup>, Uddhav Kulkarni<sup>c</sup>, Jaeyoung Jeon<sup>d</sup>, TaeYeong Im<sup>e</sup>, You Kyeong Jeong<sup>e</sup>, Dong Soo Hwang<sup>b</sup>, Jong-Seong Bae<sup>f</sup>, Kyungho Ahn<sup>\*e</sup>, Jongsup Hong<sup>\*d</sup>, Gi-Ra Yi<sup>\*a</sup>

<sup>a</sup>Department of Chemical Engineering, Pohang University of Science and Technology (POSTECH), Pohang, Republic of Korea. E-mail: yigira@postech.ac.kr

<sup>b</sup>Division of Environmental Science and Engineering, Pohang University of Science and Technology (POSTECH), Pohang, Republic of Korea.

<sup>c</sup>School of Chemical Engineering, Sungkyunkwan University (SKKU), Suwon 16419, Republic of Korea.

<sup>d</sup>School of Mechanical Engineering, Yonsei University, Seoul, 03722, Republic of Korea. E-mail: jongsup.hong@yonsei.ac.kr

<sup>e</sup>LG Energy Solution, Ltd., R&D Campus, 188 Monji-ro, Yuseong-gu, Daejeon, 34122, Republic of Korea. E-mail: akhinha@lgensol.com

<sup>f</sup>Korea Basic Science Institute (KBSI), Busan, 46742, Republic of Korea.

\*Corresponding author: akhinha@lgensol.com, jongsup.hong@yonsei.ac.kr, yigira@postech.ac.kr.

**Table S1.** The corresponding  $R_s$ ,  $R_{SEI}$ , and  $R_{ct}$  values (ohm) were extracted from the equivalent circuit in the EIS data in Si|Li half-cell configuration.

| Cell state       | LE    |           |          | LE-A  |           |          | LE-P  |           |          |
|------------------|-------|-----------|----------|-------|-----------|----------|-------|-----------|----------|
|                  | $R_s$ | $R_{SEI}$ | $R_{ct}$ | $R_s$ | $R_{SEI}$ | $R_{ct}$ | $R_s$ | $R_{SEI}$ | $R_{ct}$ |
| Before formation | 2.547 | -         | 223.6    | 2.582 | -         | 150.9    | 2.588 | -         | 204.9    |
| After Formation  | 1.289 | 8.197     | 37.97    | 1.625 | 5.161     | 34.14    | 1.698 | 6.138     | 36.4     |

**Table S2.** DSC measurement results with different electrolytes. All the electrolytes are mixed with a fully lithiated Si anode.

| Electrolyte        | Specific Heat Flow [W/g] | Exothermic Temperature [°C] |            |
|--------------------|--------------------------|-----------------------------|------------|
| LE-VA              | 3.82                     | 302                         | With VC    |
| LE-V               | 48.95                    | 335.6                       |            |
| LE-VP              | 51.7                     | 299                         |            |
| LE-A               | 9.56                     | 251.1                       | Without VC |
| LE                 | 37.34                    | 282.3                       |            |
| LE-P               | 40.04                    | 252.7                       |            |
| LE-VA@Si<br>+ LE-V | 3.28                     | 291                         | With VC    |
| LE-V@Si<br>+ LE-VA | 38.79                    | 283                         |            |

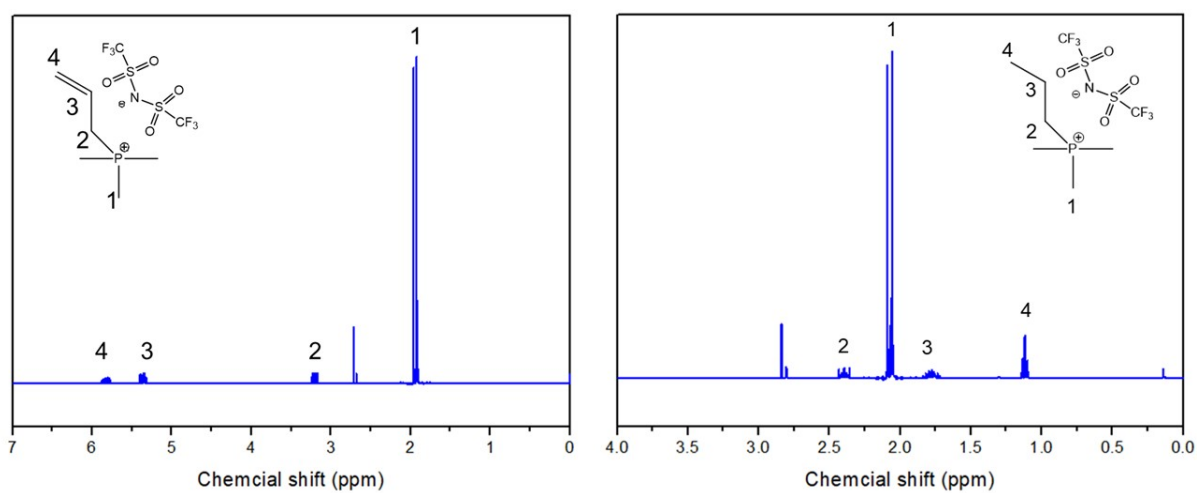

**Figure S1.**  $^1\text{H}$  NMR data of  $\text{AP}_{111}\text{T}$  and  $\text{PP}_{111}\text{T}$  monomer.

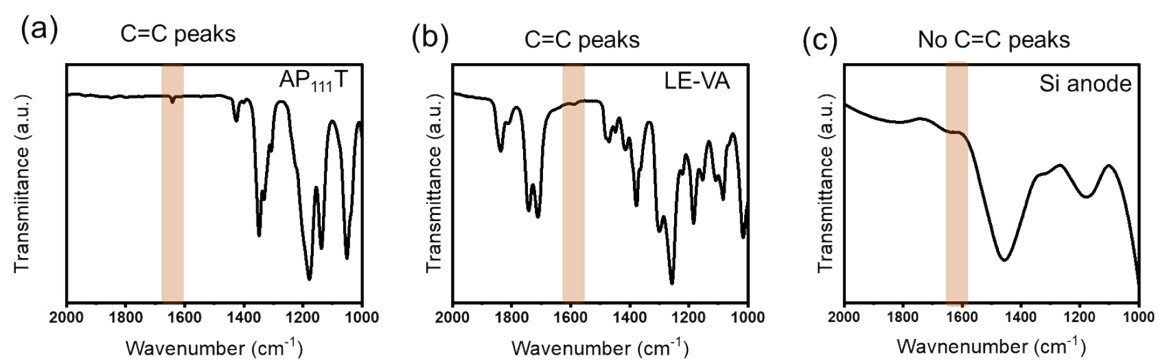

**Figure S2.** FT-IR spectra of (a) AP<sub>111</sub>T, (b) LE-VA, and (c) the silicon anode surface after cycling in LE-VA. The absence of the C=C peak on the silicon anode surface indicates successful polymerization of the 5 wt.% AP<sub>111</sub>T monomer.

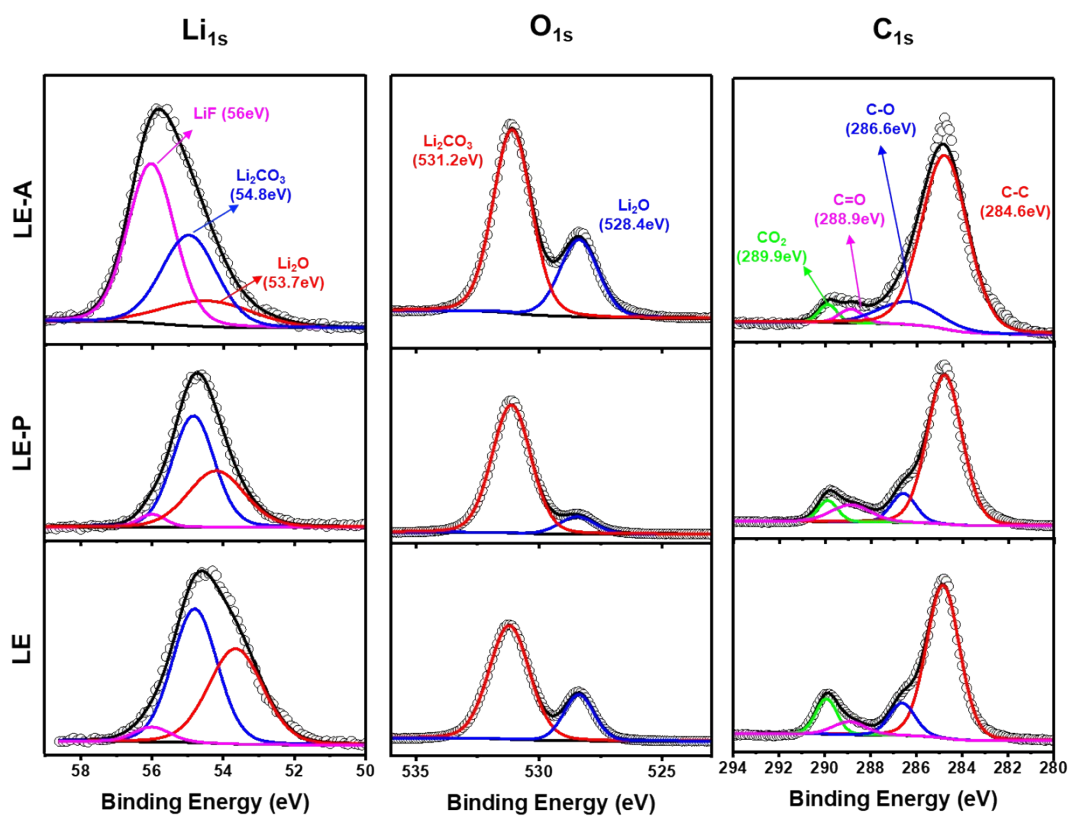

**Figure S3.** XPS spectra for one lithiated Si anode with different electrolytes. In the  $\text{Li}_{1s}$  the  $\text{LiF}$  (56 eV),  $\text{Li}_2\text{CO}_3$  (54.8 eV),  $\text{Li}_2\text{O}$  (53.7 eV) peaks were observed.

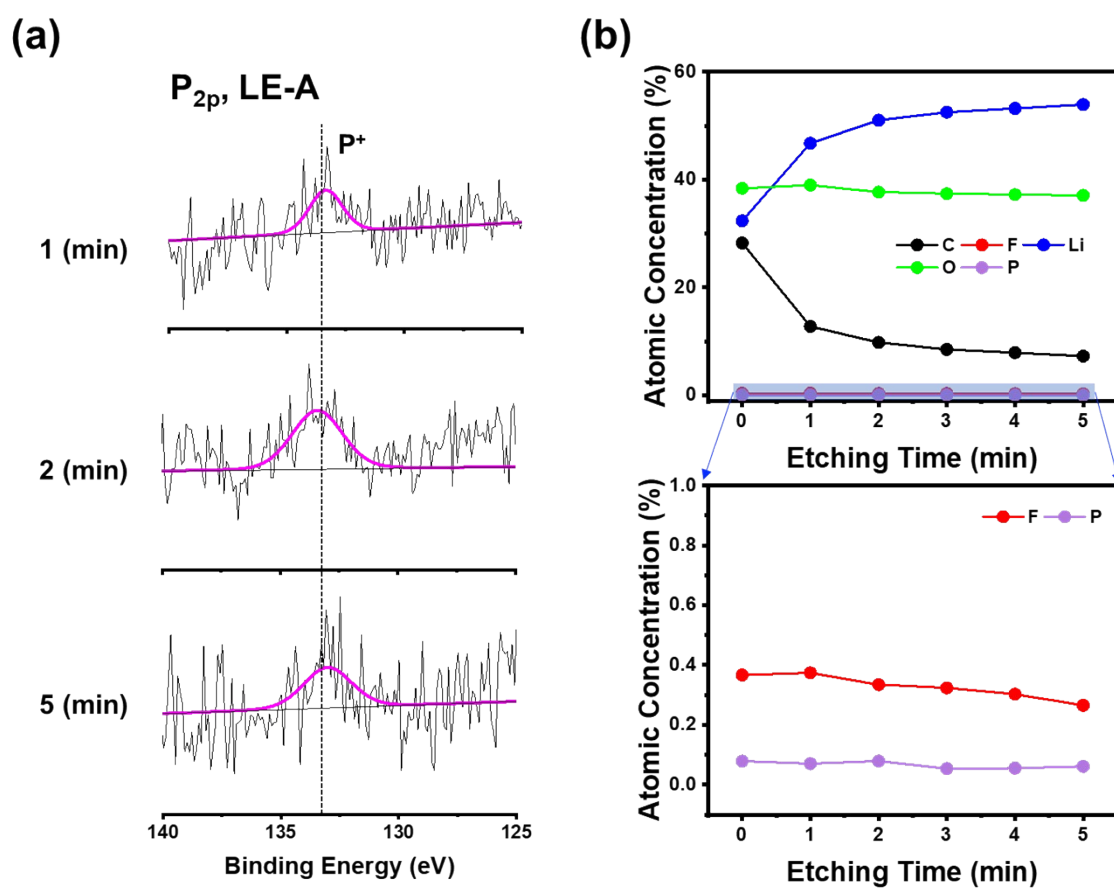

**Figure S4.** Depth profile along the Ar etching time. All the elements represented lithiated LE-A Si anode. (a) P<sub>2p</sub> spectra and (b) atomic ratio in the SEI layer.

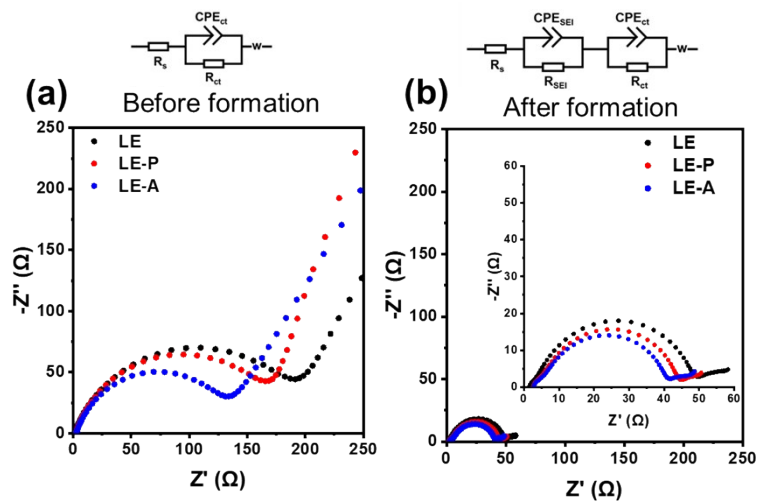

**Figure S5.** Electrochemical impedance spectroscopy (EIS) data and their equivalent circuits for Si half-cells were shown for (a) before and (b) after formation with different electrolytes. The inset profile in the (b) was presented in an enlarged view.



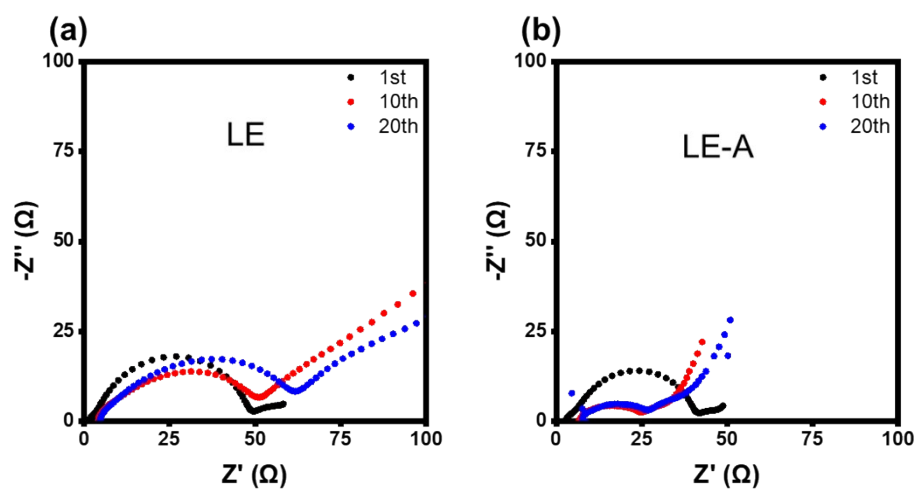

**Figure S6.** Electrochemical impedance spectroscopy (EIS) data for Si half-cells after the 1<sup>st</sup>, 10<sup>th</sup>, and 20<sup>th</sup> cycles are shown for (a) the LE and (b) the LE-A.

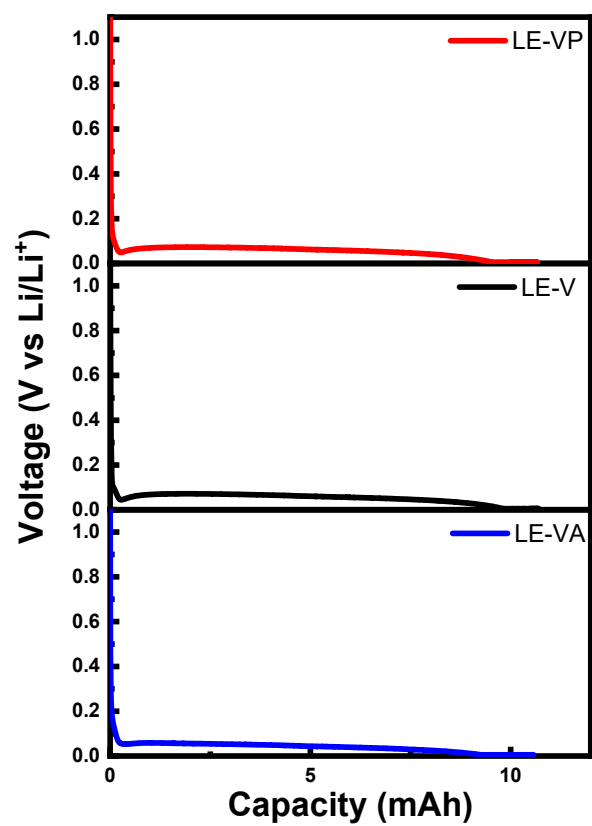

**Figure S7.** Discharge profiles for first lithiation of Silicon anode in this study with different electrolytes.

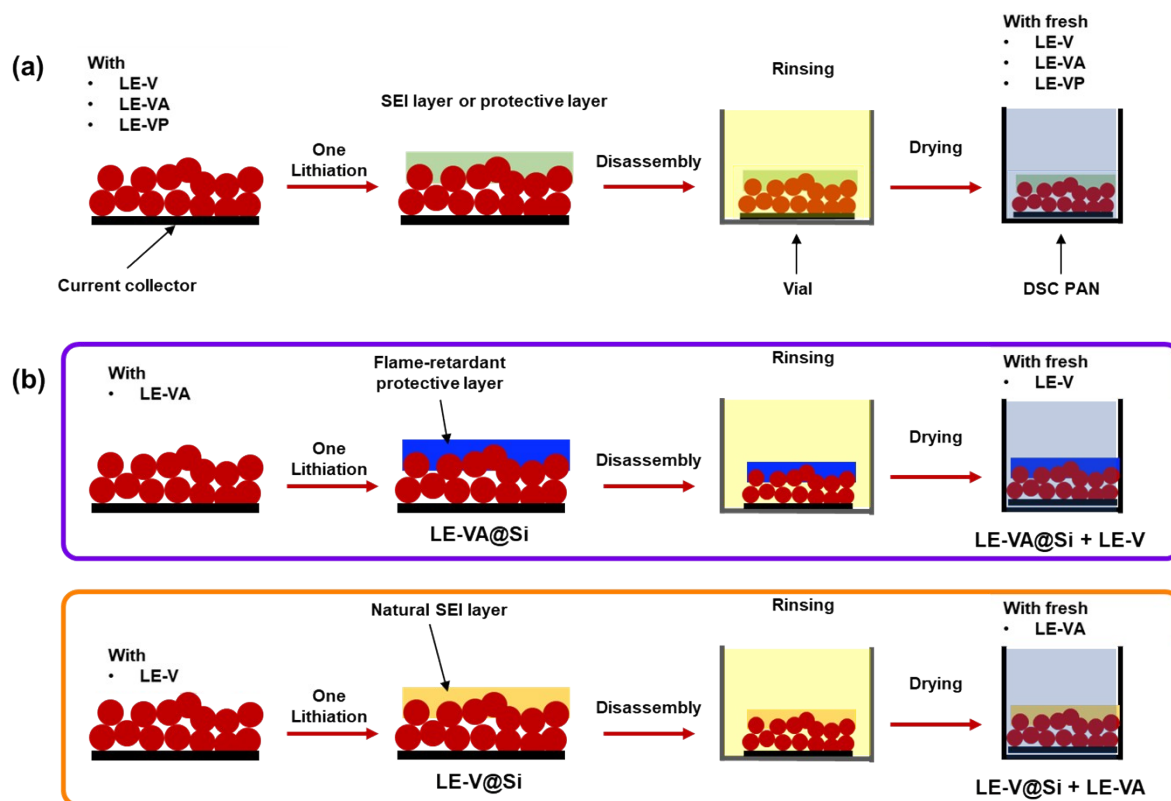

**Figure S8.** Preparation process for DSC sampling. (a) same electrolyte used for lithiation and DSC sampling. (b) Different electrolyte used for lithiation and DSC sampling.

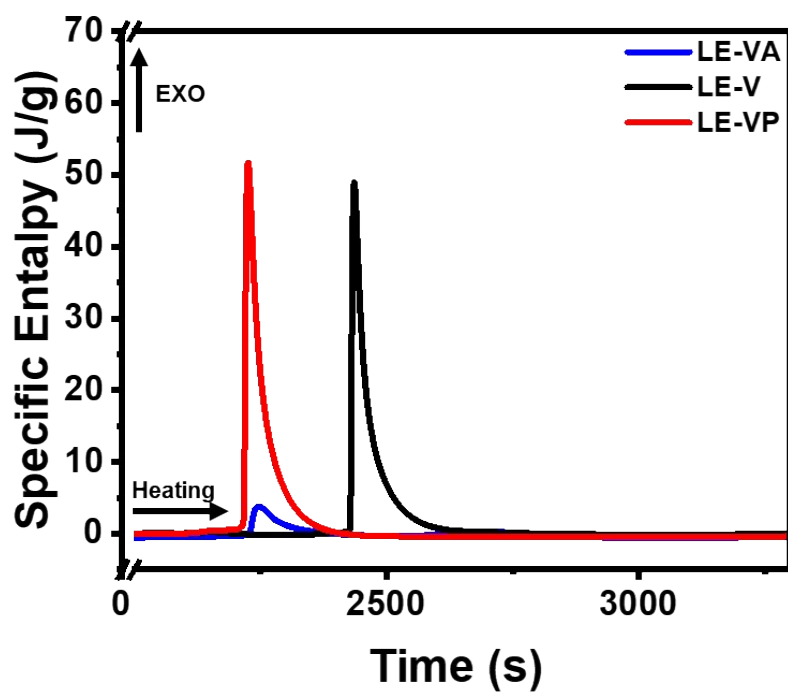

**Figure S9.** Specific enthalpy as a function of temperature for lithiated Si anodes in the presence of LE-V series electrolyte.

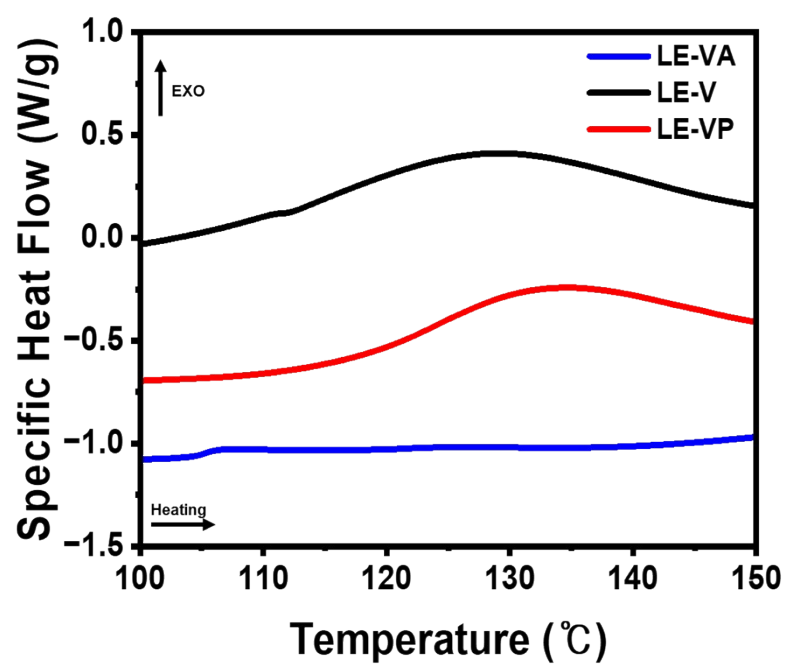

**Figure S10.** Specific heat flow in the low-temperature range (100-150 °C) for lithiated Si anodes in the presence of LE-V with or without additives.

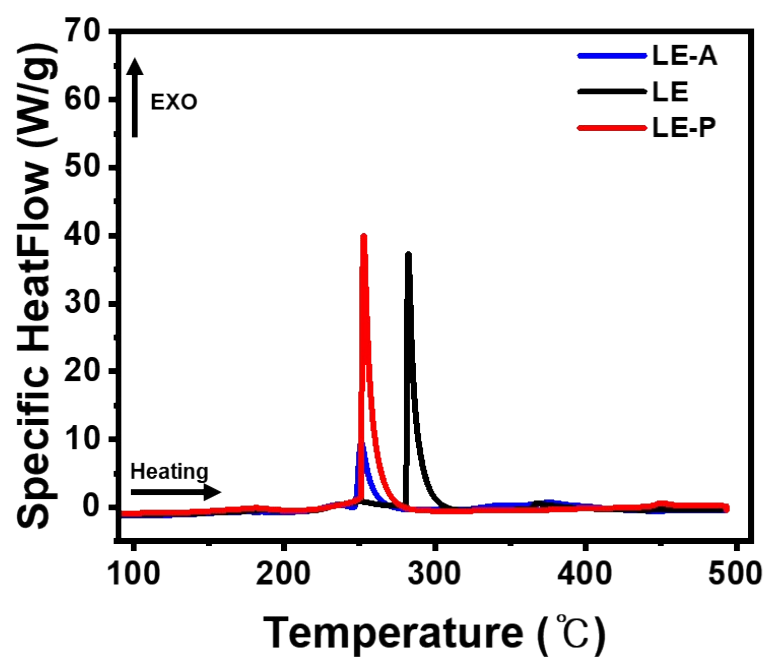

**Figure S11.** Specific heat flow for lithiated Si anodes with LE series. Which didn't include VC additive.

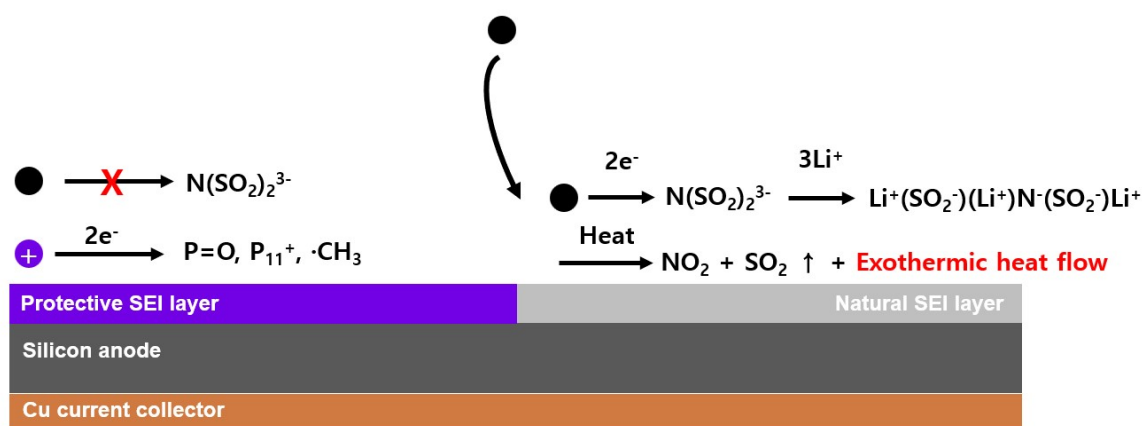

- FSI-  $\oplus$  Phosphonium

**Figure S12.** Possible mechanism for radical scavenging of AP<sub>111</sub>T-derived protective layer.

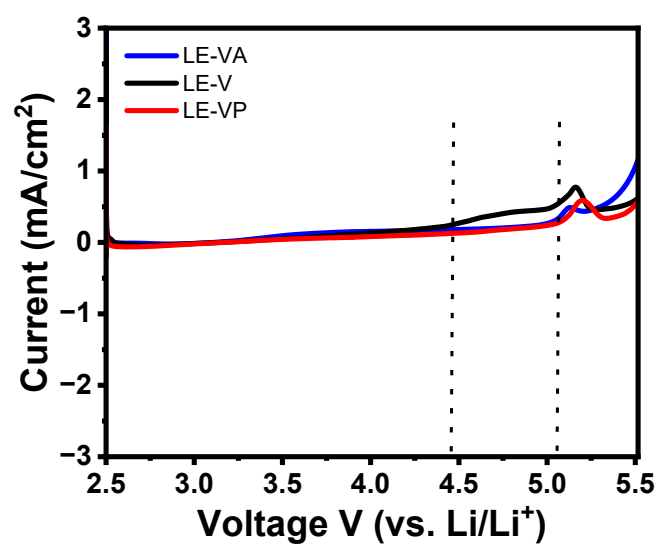

**Figure S13.** Linear sweep voltammogram (LSV) curves of Li||Pt cells with three different electrolytes as a scan rate of 0.1 mV/s.



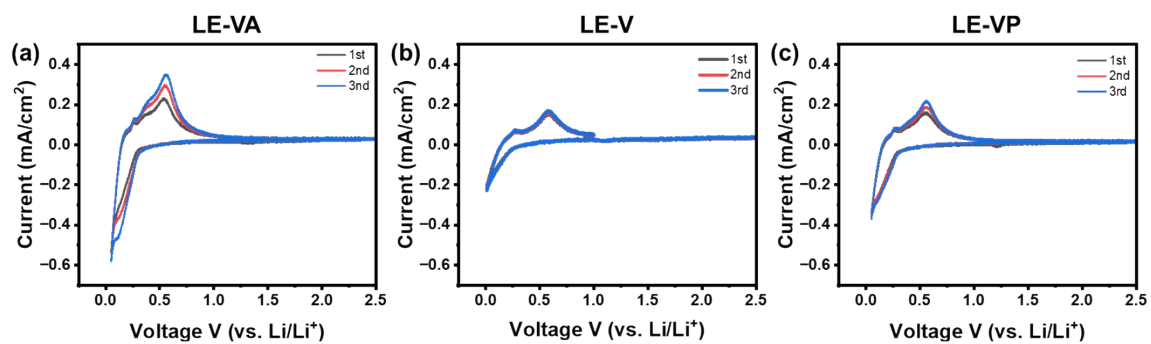

**Figure S14.** Cyclic voltammogram (CV) of different electrolytes for (a) LE-VA, (b) LE-V and (c) LE-VP.

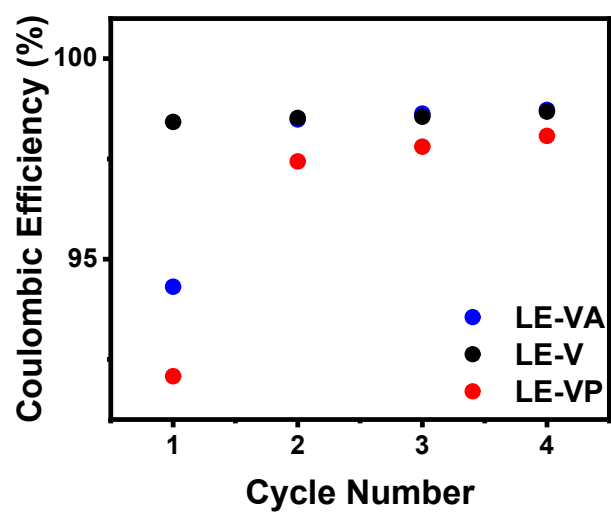

**Figure S15.** Initial coulombic efficiency of long-term cycling measurements.

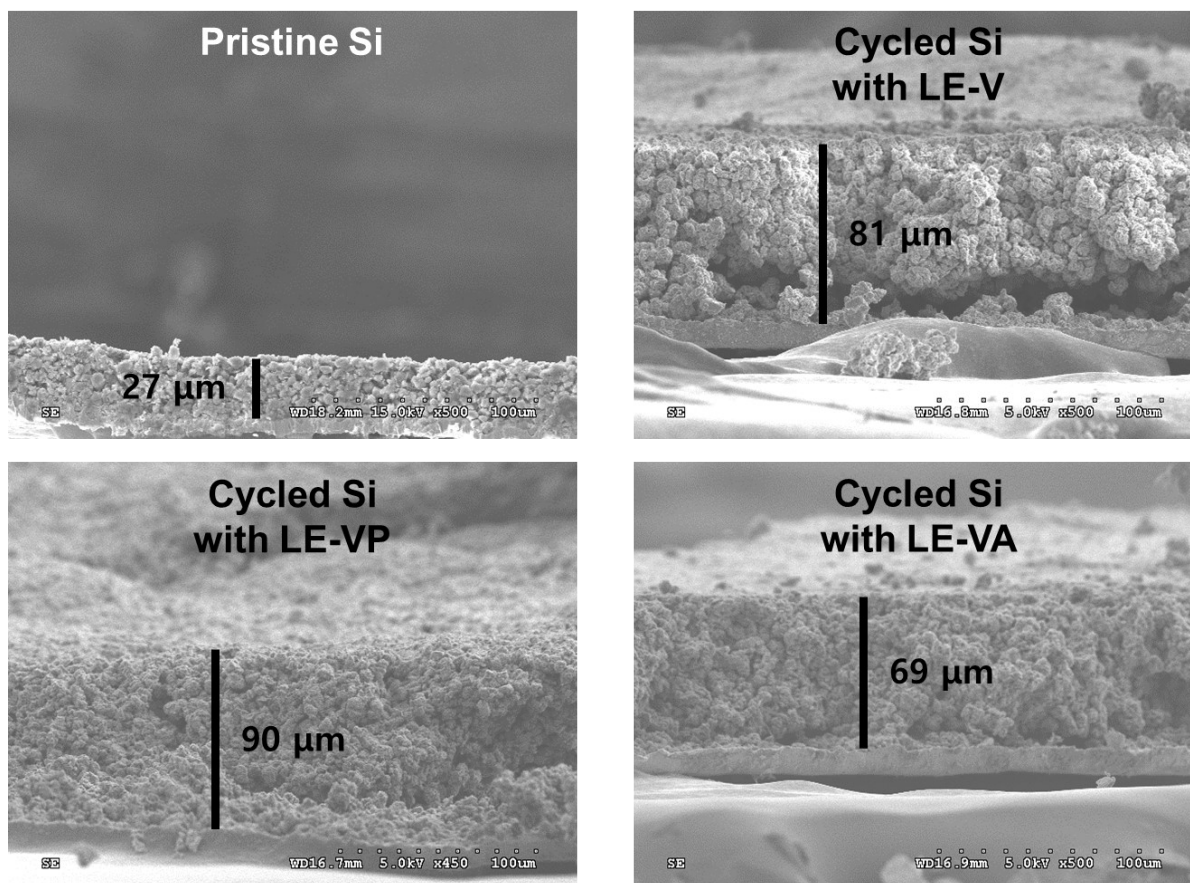

**Figure S16.** Cross-sectional SEM images of pristine state Si anode and cycled Si electrode with different electrolytes.
